# Supplementary material for: Engineering defect clusters in distorted NaMgF3 perovskite and their important roles in tuning the emission characteristics of Eu3+ dopant ion
Source: Royal Society of Chemistry journal article supplement (doi:10.1039/d0ra10008k), 2021-01-01
Supplement: d0ra10008k1.pdf [file d0ra10008k1.pdf]

## Engineering the defect clusters in distorted NaMgF<sub>3</sub> perovskite and their important roles in tuning the emission characteristics of Eu<sup>3+</sup> dopant ion

Sumanta Mukherjee<sup>ac</sup>, Nimai Pathak<sup>b\*</sup>, Debarati Das<sup>b</sup> and Dhanadeep Dutta<sup>bc</sup>

<sup>a</sup> Fuel Chemistry Division, Bhabha Atomic Research Centre, Mumbai, 400085, India

<sup>b</sup> Radiochemistry Division, Bhabha Atomic Research Centre, Mumbai, 400085, India

<sup>c</sup> Homi Bhabha National Institute, Mumbai-400085, India

\*Email: [nmpathak4@gmail.com](mailto:nmpathak4@gmail.com), [nimai@barc.gov.in](mailto:nimai@barc.gov.in)

Telephone- +91-22-25590715/0636

Fax- +91-22-25405151

### Instrumentation:

#### X-Ray diffraction (XRD):

All the XRD patterns for Undoped and doped compounds are recorded using a rotating anode based powder X-ray diffractometer (model Rigaku, Japan). As a X-ray source a CuK<sub>α</sub> (λ= 1.5406 and 1.5444 Å) monochromatic radiation was used. We have collected the diffraction patterns within the 2θ range of 10-70 with a step width of 0.02 and scan rate of 5s.

#### Fourier-transform infrared (FTIR) spectroscopy:

We have recorded all the FTIR spectra in the spectral range 5000-500 cm<sup>-1</sup> using a Bruker Platinum ATR FTIR spectrometer

#### Scanning electron microscope (SEM) and Energy-dispersive X-ray spectroscopy (EDX) analysis:

A SNE4500MSEC instrument with Minisem software was used to record the SEM figures while the EDX spectrum was recorded on a Bruker Nano GmbH XFlash detector 410-M (Berlin, Germany) and the spectrum was analysed using Quantax Esprit 2.0 Bruker microanalysis software.

#### Photoluminescence (PL) spectroscopy:

We have used an Edinburgh CD-920 unit with M 300 monochromators for PL measurements of all the compounds. All the data acquisition and the analysis were carried using F-900 software which was provided by Edinburgh Analytical Instruments, UK. As a source we have used a Xenon flash with a frequency of 100 Hz was utilized as a source. For each of the measurements such as excitation and emission spectra, multiple scans (at least five) were taken to maximize the S/N ratio. The widely used and well established Time-correlated single-photon counting (TCSPC) technique was used for lifetime study.

#### Electron Paramagnetic Resonance (EPR) spectroscopy:

We have carried out the EPR experiments using a Bruker EMX (micro) 10/12 EPR spectrometer, which operates at X-band frequency (9.4218 GHz). The instrument is equipped with 100 kHz field modulation and phase sensitive detection for obtaining the first derivative signal. Diphenyl picrylhydrazyl (DPPH) used a standard to calibrate the g-values of the resonance signal.

## Positron Annihilation Lifetime Spectroscopy (PALS) study:

Positron annihilation lifetime measurements were carried out using two BaF<sub>2</sub> scintillation detectors connected to fast-fast coincidence system. A <sup>22</sup>Na positron source (~ 10 μCi) sealed within a thin Kapton foil was put inside the powder sample in an aluminum vial. Subsequently, the vial was kept between two BaF<sub>2</sub> detectors. The time resolution measured with <sup>60</sup>Co in the <sup>22</sup>Na energy window settings was 250ps. The time calibration was kept 12.5 ps/channel. In each the measurement, the spectrum with approximately 2 x 10<sup>6</sup> counts was acquired. The PAL spectra were analysed for discrete lifetime components using PALSfit analysis program.<sup>1</sup>

<sup>1</sup> P. Kirkegaard, J. V. Olsen, M. M. Eldrup and N. J. Pedersen. PALSfit. Roskilde: Danmarks Tekniske Universitet, Risø National laboratoriet for Bæredygtig Energi. (Denmark. Forskningscenter Risoe. Risoe-R; No. 1652(EN)), 2009.

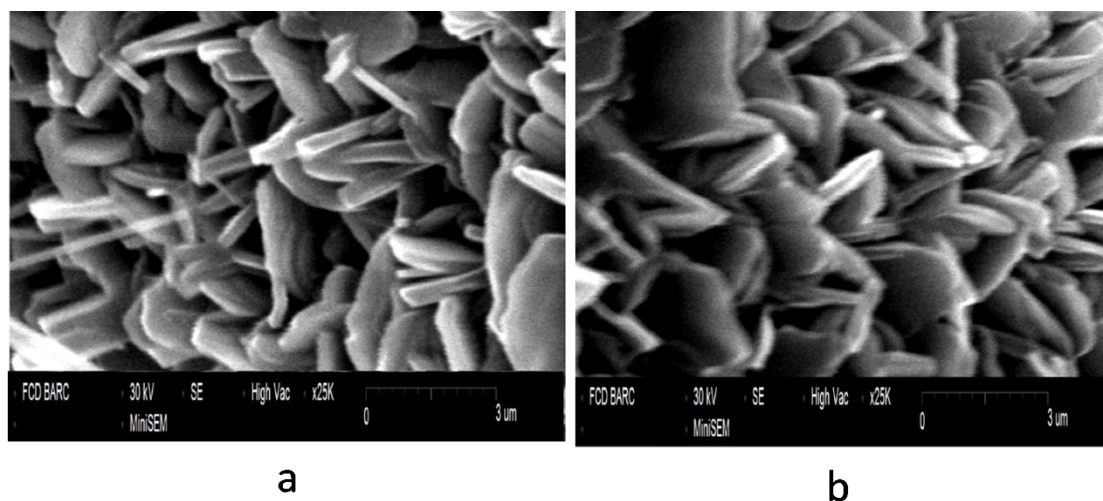

**Figure S1:** SEM images of a) NaMgF<sub>3</sub> and b) Eu<sup>3+</sup><sub>0.01</sub>Li<sup>+</sup><sub>0.005</sub>:NaMgF<sub>3</sub>

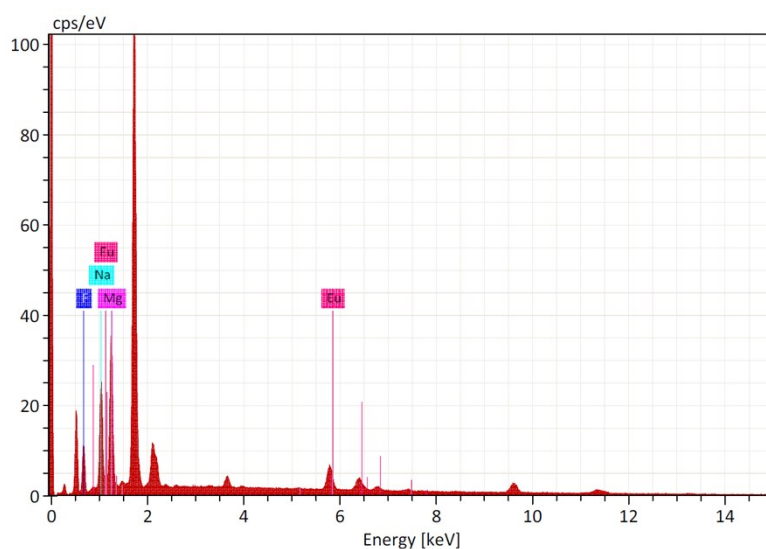

**Figure S2:** Elemental study of 0.5 mol % Eu<sup>3+</sup> doped NaMgF<sub>3</sub> by EDX.

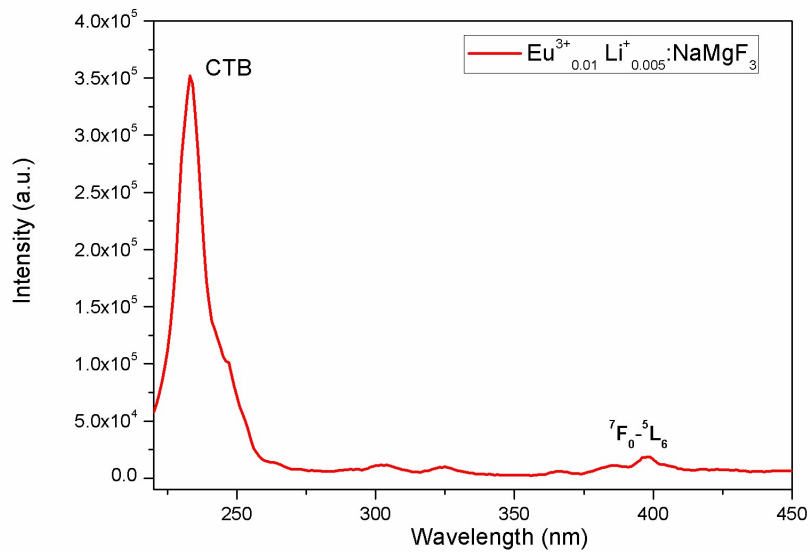

**Figure S3.** Excitation spectra of  $\text{Eu}^{3+}_{0.01}\text{Li}^{+}_{0.005}\text{NaMgF}_3$  at an emission wavelength of 615 nm

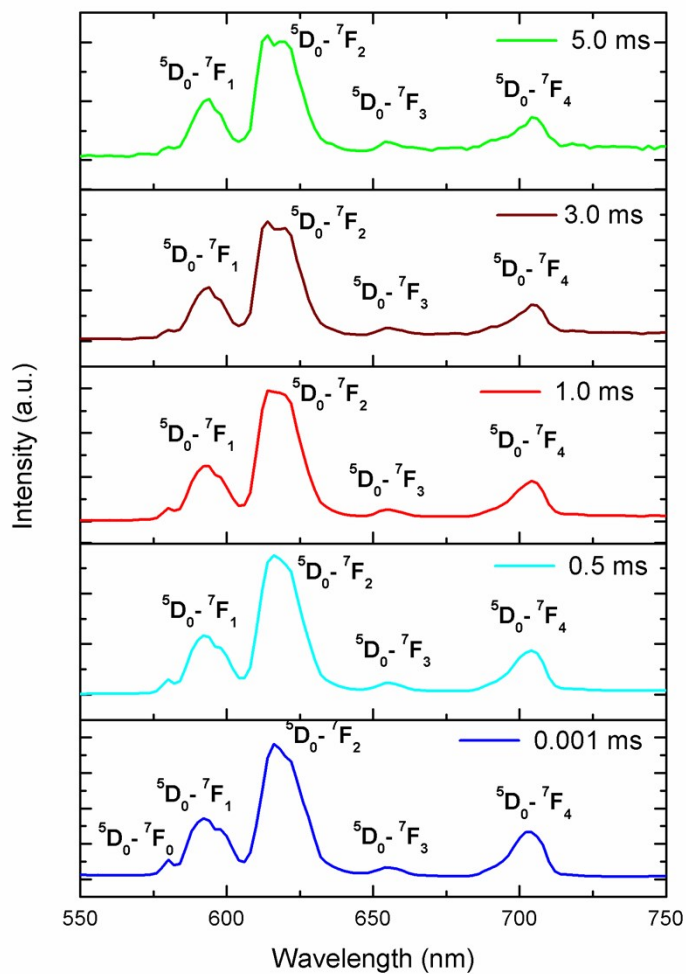

**Figure S4:** TRES spectra of 1 mol %  $\text{Eu}^{3+}$  doped  $\text{NaMgF}_3$  compound at different delay time.
